# Supplementary material for: PLS/OPLS models in metabolomics: the impact of permutation of dataset rows on the K-fold cross-validation quality parameters
Source: Royal Society of Chemistry journal article supplement (doi:10.1039/c4mb00414k), 2014-10-23
Supplement: c4mb00414k1.pdf [file c4mb00414k1.pdf]

## Supplementary Material A

### Distribution of the optimal number of components.

We performed 1000 rearrangements of the rows of the dataset used to build figure 1 (Supplementary Data, Dataset1.xlsx).

For each rearrangement, the value of the optimal number of component (ONC) was determined by looking for the first local minimum of  $p_{CV-ANOVA}$  when NC is incremented.

The ONC distribution is represented in figure S1. We observe that for the 1000 rearrangements, values of ONC spread from 1 to 6. This corresponds to a Q2 that spreads from -0.8 to 0.38.

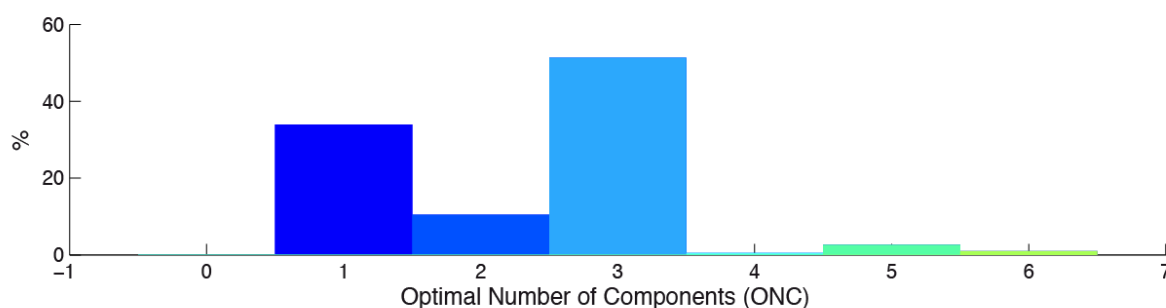

Figure S1: Variation of ONC when 1000 random permutations of the dataset lines are performed. Each color is associated to a specific value of NSC.
